# Supplementary material for: Polyamide-imide/polyimide alloy with enhanced energy density and efficiency
Source: Royal Society of Chemistry journal article supplement (doi:10.1039/d2tc03333j), 2022-01-01
Supplement: d2tc03333j1.pdf [file d2tc03333j1.pdf]

*Supplementary Material*

**Polyamide-imide/polyimide alloy with enhanced energy density  
and efficiency**

Man Liu <sup>a†</sup>, Yiheng Song <sup>a†</sup>, Hongmei Qin <sup>a</sup>, Ziwei Li <sup>a</sup>, Yuheng Fu <sup>a</sup>, Chuanxi Xiong  
<sup>a,b,\*</sup>, Feihua Liu<sup>c,\*</sup>

<sup>a</sup> School of Materials Science and Engineering, State Key Laboratory of Silicate Materials  
for Architectures, Wuhan University of Technology, Wuhan 430070, China

<sup>b</sup> Hubei Engineering Research Center for Green & Precision Material Forming, Wuhan  
University of Technology, Wuhan 430070, China

<sup>c</sup> Sauvage Laboratory for Smart Materials, School of Materials Science and Engineering,  
Harbin Institute of Technology (Shenzhen), Shenzhen 518055, China

† These authors contributed equally to this work.

\* Corresponding Author: cxiong@whut.edu.cn (Chuanxi Xiong), liufeihua@hit.edu.cn  
(Feihua Liu)

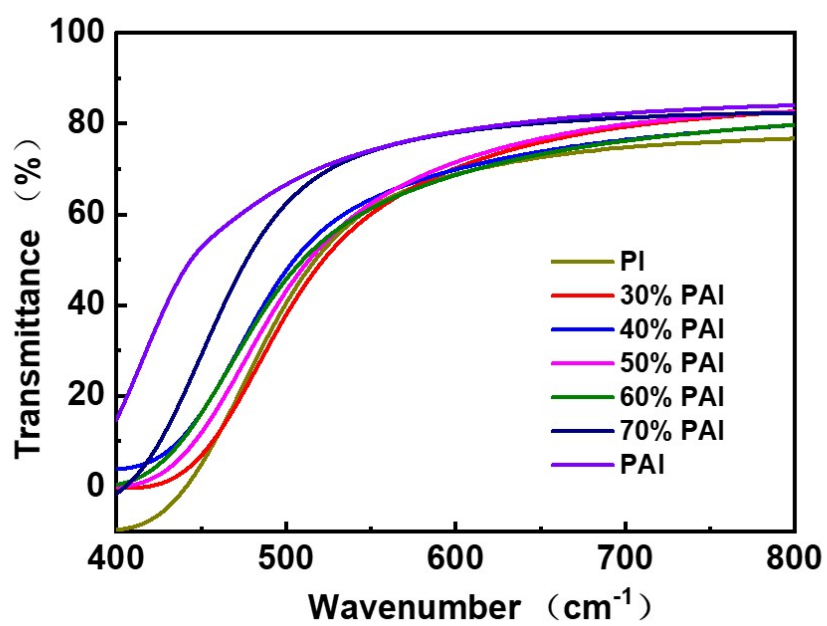

Fig. S1. UV spectra of PI, PAI and PAI/PI alloys.

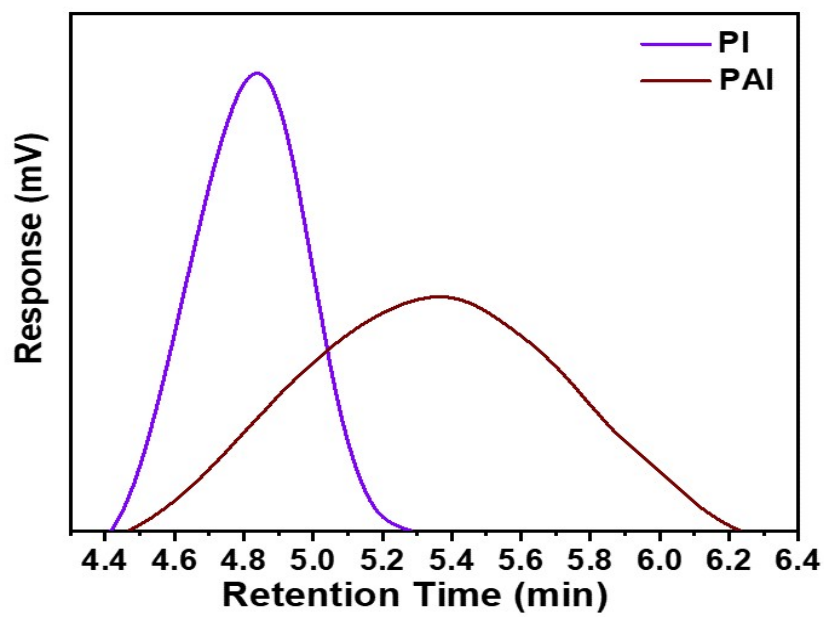

Fig. S2. GPC curves of PI and PAI.

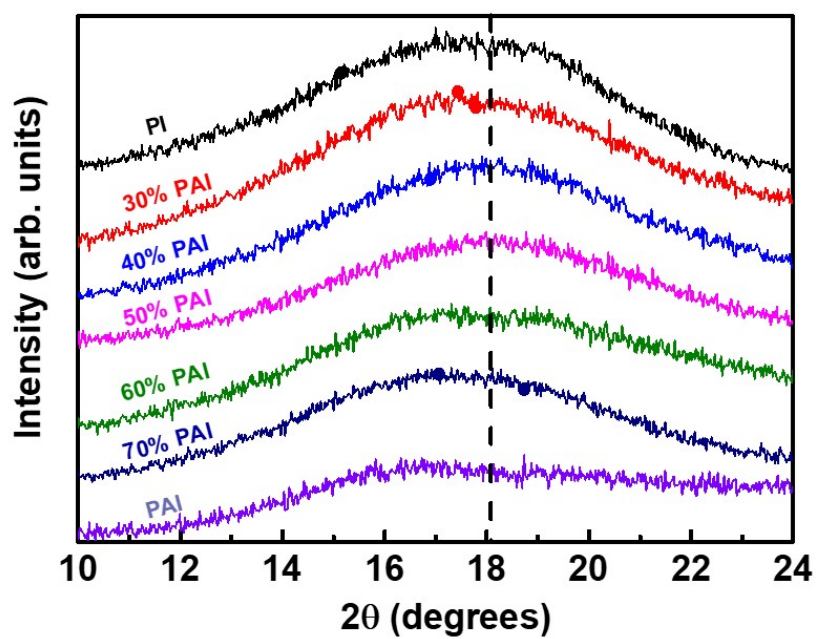

Fig. S3. X-ray diffraction (XRD) spectra of PI, PAI and PAI/PI alloys.

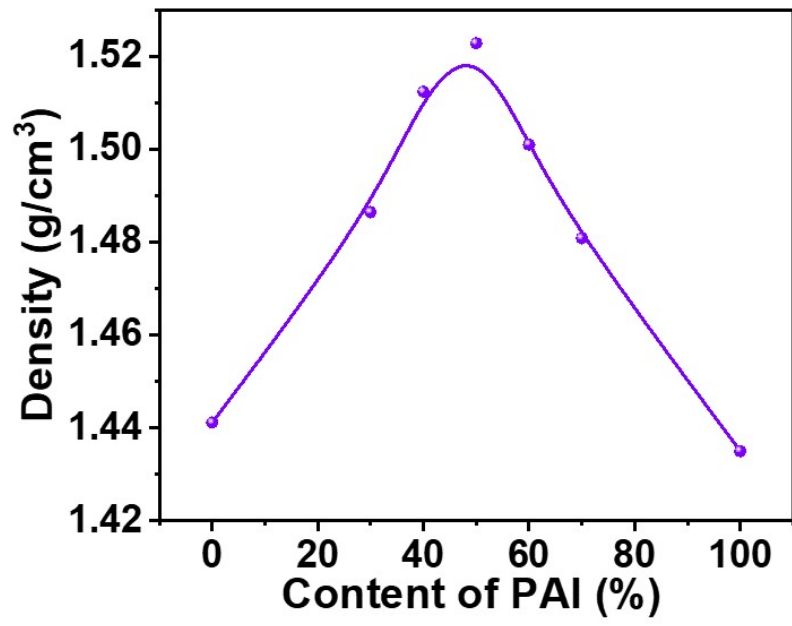

Fig. S4. The density of PAI/PI alloys with different PAI contents.

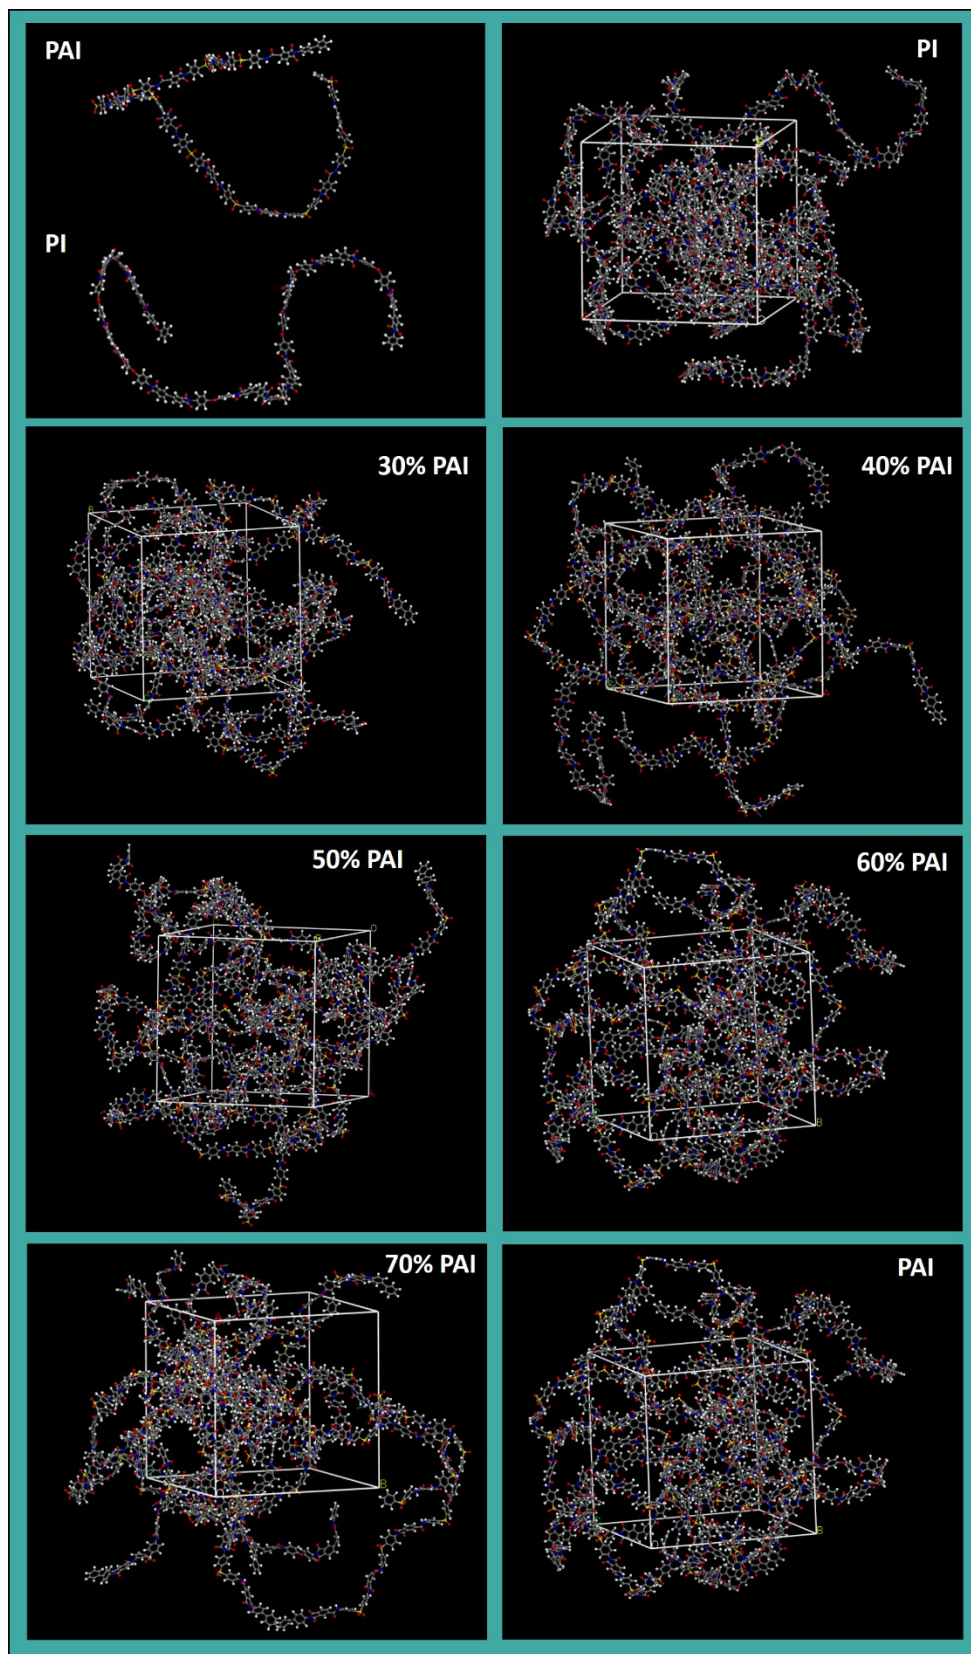

**Fig. S5.** Molecular structure modeling of PAI/PI alloys with different PAI contents by Materials Studio.
